# Supplementary material for: All-metal aromatic clusters M42− (M = B, Al, and Ga). Are π-electrons distortive or not?
Source: Royal Society of Chemistry journal article supplement (doi:10.1039/c1cp22759a), 2011-01-01
Supplement: c1cp22759a.pdf [file c1cp22759a.pdf]

## Supporting Information for

# All-Metal Aromatic Clusters $M_4^{2-}$ (M = B, Al, and Ga). Are $\pi$ -Electrons Distortive or Not?

Jordi Poater,<sup>1</sup> Ferran Feixas,<sup>1</sup> F. Matthias Bickelhaupt,<sup>2,\*</sup> and Miquel Solà<sup>1,\*</sup>

<sup>1</sup> Institut de Química Computacional and Departament de Química, Universitat de Girona, Campus de Montilivi, 17071 Girona, Catalonia, Spain (Fax: +34 - 972 - 41 83 56. E-mail: [miquel.sola@udg.edu](mailto:miquel.sola@udg.edu))

<sup>2</sup> Department of Theoretical Chemistry and Amsterdam Center for Multiscale Modeling, VU University Amsterdam, De Boelelaan 1083, NL-1081 HV Amsterdam, The Netherlands (Fax: +31-20-59 87 629. E-mail: [F.M.Bickelhaupt@vu.nl](mailto:F.M.Bickelhaupt@vu.nl))

## Contents

**Table S1.** Bond-energy decomposition of all-metal clusters  $B_4^{2-}$ ,  $Al_4^{2-}$  and  $Ga_4^{2-}$  and the organic systems  $C_4H_4$ ,  $C_4H_4^{2+}$  and  $C_4H_4^{2-}$  constructed from two equivalent rigid fragments as defined in Figure 1, computed at BP86/TZ2P.

**Table S2.** Cartesian coordinates of all stationary points occurring in this study, computed at BP86/TZ2P.

**Table S1.** Bond-energy decomposition (in kcal/mol) of all-metal clusters  $B_4^{2-}$ ,  $Al_4^{2-}$  and  $Ga_4^{2-}$  and the organic systems  $C_4H_4$ ,  $C_4H_4^{2+}$  and  $C_4H_4^{2-}$  constructed from two equivalent rigid fragments as defined in Figure 1, computed at BP86/TZ2P.

|                         | $B_4^{2-}$ | $Al_4^{2-}$ | $Ga_4^{2-}$ | $C_4H_4$       | $C_4H_4^{2+}$ | $C_4H_4^{2-}$ |
|-------------------------|------------|-------------|-------------|----------------|---------------|---------------|
| $\Delta E_{oi}(\sigma)$ | -710.03    | -180.11     | -153.34     | -747.36        | -827.42       | -707.02       |
| $\Delta E_{oi}(\pi)$    | -65.47     | -26.83      | -24.64      | -108.53        | -121.41       | -325.22       |
| $\Delta E_{oi}$         | -775.51    | -206.96     | -177.98     | -855.87        | -948.83       | -1032.25      |
| $\Delta E_{Pauli}$      | 784.44     | 245.15      | 250.45      | 665.37         | 684.66        | 549.92        |
| $\Delta V_{elstat}$     | -211.43    | -110.38     | -128.62     | -438.33        | -257.36       | -286.90       |
| $\Delta E_{int}$        | -202.49    | -72.18      | -56.15      | -628.83        | -521.53       | -769.23       |
| $R(X-X)$                | 1.657      | 2.603       | 2.641       | 1.582<br>1.338 | 1.452         | 1.478         |
| $\theta$                | 90.0       | 90.0        | 90.0        | 99.5           | 90.0          | 90.0          |

**Table S2.** Cartesian coordinates (in Å) of all stationary points occurring in this study, computed at BP86/TZ2P.

---

| $B_4^{2-}$ |           |           |          |
|------------|-----------|-----------|----------|
| B          | 1.171683  | 0.000000  | 0.000000 |
| B          | 0.000000  | 1.171683  | 0.000000 |
| B          | -1.171683 | 0.000000  | 0.000000 |
| B          | 0.000000  | -1.171683 | 0.000000 |

| $Al_4^{2-}$ |           |           |          |
|-------------|-----------|-----------|----------|
| Al          | 1.840918  | 0.000000  | 0.000000 |
| Al          | 0.000000  | 1.840918  | 0.000000 |
| Al          | -1.840918 | 0.000000  | 0.000000 |
| Al          | 0.000000  | -1.840918 | 0.000000 |

| $Ga_4^{2-}$ |           |           |          |
|-------------|-----------|-----------|----------|
| Ga          | 1.321174  | 1.321174  | 0.000000 |
| Ga          | 1.321174  | -1.321174 | 0.000000 |
| Ga          | -1.321174 | -1.321174 | 0.000000 |
| Ga          | -1.321174 | 1.321174  | 0.000000 |

| $C_4H_4$ |           |           |          |
|----------|-----------|-----------|----------|
| C        | 0.000000  | -1.021364 | 0.000000 |
| C        | 1.021364  | 0.000000  | 0.000000 |
| C        | 0.000000  | 1.021364  | 0.000000 |
| C        | -1.021364 | 0.000000  | 0.000000 |
| H        | -2.106958 | 0.000000  | 0.000000 |
| H        | 0.000000  | 2.106958  | 0.000000 |
| H        | 2.106958  | 0.000000  | 0.000000 |
| H        | 0.000000  | -2.106958 | 0.000000 |

| $C_4H_4^{2-}$ |           |           |          |
|---------------|-----------|-----------|----------|
| C             | 0.739130  | 0.739130  | 0.000000 |
| H             | 1.519701  | 1.519701  | 0.000000 |
| C             | 0.739130  | -0.739130 | 0.000000 |
| H             | 1.519701  | -1.519701 | 0.000000 |
| C             | -0.739130 | -0.739130 | 0.000000 |
| H             | -1.519701 | -1.519701 | 0.000000 |
| C             | -0.739130 | 0.739130  | 0.000000 |
| H             | -1.519701 | 1.519701  | 0.000000 |

$C_4H_4^{2+}$

|   |           |           |          |
|---|-----------|-----------|----------|
| C | 1.026470  | 0.000000  | 0.000000 |
| H | 2.128695  | 0.000000  | 0.000000 |
| C | 0.000000  | 1.026470  | 0.000000 |
| H | 0.000000  | 2.128695  | 0.000000 |
| C | -1.026470 | 0.000000  | 0.000000 |
| H | -2.128695 | 0.000000  | 0.000000 |
| C | 0.000000  | -1.026470 | 0.000000 |
| H | 0.000000  | -2.128695 | 0.000000 |

---
